# Supplementary material for: Predation Risk Perception, Food Density and Conspecific Cues Shape Foraging Decisions in a Tropical Lizard
Source: PLOS journal article supplement (doi:10.1371/journal.pone.0138016), 2015-09-18

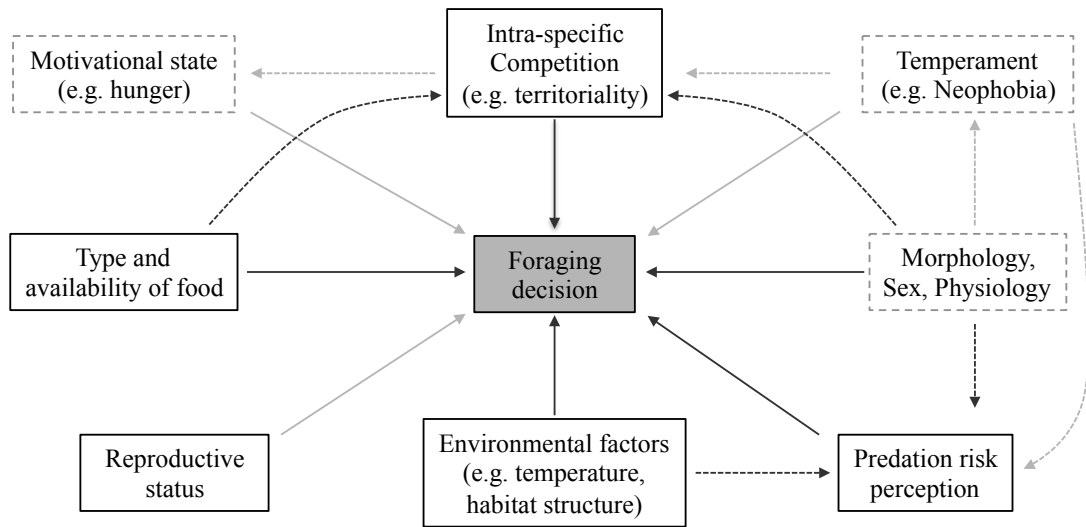

Supplement: S1 (10.1371/journal.pone.0138016.s001) [file journal.pone.0138016.s001]
