# Supplementary material for: Predation Risk Perception, Food Density and Conspecific Cues Shape Foraging Decisions in a Tropical Lizard
Source: PLOS journal article supplement (doi:10.1371/journal.pone.0138016), 2015-09-18

**Long distance**

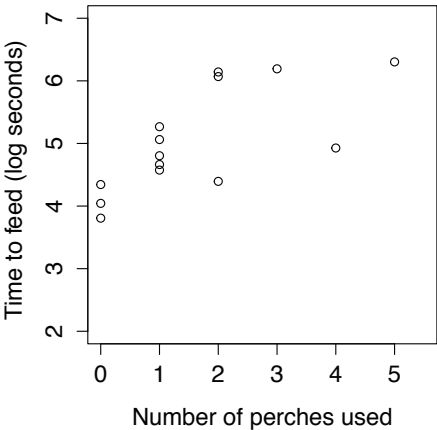

**Short distance**

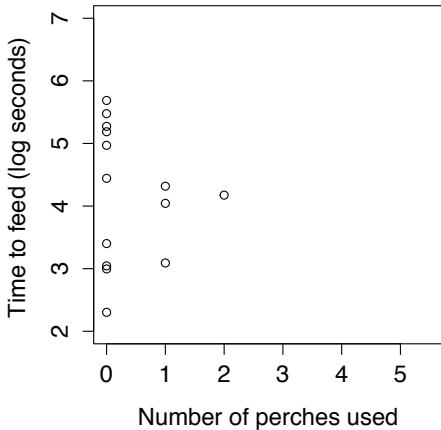

Supplement: S4 (10.1371/journal.pone.0138016.s004) [file journal.pone.0138016.s004]
